# Supplementary material
Source: ML conference proceedings conference paper supplement (https://proceedings.neurips.cc/paper_files/paper/2023/hash/5965f3a748a8d41415db2bfa44635cc3-Abstract.html)
Supplement: Supplementary file 1 [file 5965f3a748a8d41415db2bfa44635cc3-Supplemental-Conference.pdf]

## 436 A Notations and mathematical proofs

### 437 A.1 Notations

Table 3: Notations.

| Notation                           | Description                                                                      |
|------------------------------------|----------------------------------------------------------------------------------|
| $\mathcal{K}$                      | The knowledge base                                                               |
| $\mathcal{E}$                      | The entity set                                                                   |
| $\mathcal{R}$                      | The relation set                                                                 |
| $\mathcal{O}, \mathcal{H}$         | The set of observed and unobserved facts                                         |
| $\mathbf{x}, \mathbf{y}$           | The assignments of $\mathcal{O}$ and $\mathcal{H}$ , respectively                |
| $\{F_q, W_q\}_{q=1}^m$             | The set of logic rules and attached weights                                      |
| $\mathcal{I}_q^-, \mathcal{I}_q^+$ | The index set of premise atoms and conclusion atoms of rule $F_q$ , respectively |
| $A, B, \dots$                      | Variables in logic rules                                                         |
| $\{G_q^{(j)}, j \in t_q\}$         | All ground formulas created by the $q_{th}$ logic rule                           |
| $\Phi_q(\mathbf{y}, \mathbf{x})$   | The sum of potentials of all ground formulas of $F_q$                            |
| $\theta$                           | The embedding parameters                                                         |

### 438 A.2 Derivation of rule weight gradient

439 Given

$$P_{\mathbf{w}}^*(\mathbf{y} | \mathbf{x}) = \prod_{i=1}^n P^*(y_i | \text{MB}(y_i), \mathbf{x}) = \prod_{i=1}^n \frac{\exp[-f_{\mathbf{w}}^i(y_i \cup \mathbf{y}_{\setminus i}, \mathbf{x})]}{Z_i(\mathbf{W}, y_i \cup \mathbf{y}_{\setminus i}, \mathbf{x})},$$

$$Z_i(\mathbf{W}, y_i \cup \mathbf{y}_{\setminus i}, \mathbf{x}) = \int_{y_i} \exp[-f_{\mathbf{w}}^i(y_i \cup \mathbf{y}_{\setminus i}, \mathbf{x})], \quad f_{\mathbf{w}}^i = \sum_{q=1}^m W_q \sum_{j=1}^{n_q} \mathbf{1}_{\{y_i \rightarrow G_q^{(j)}\}} d(G_q^{(j)}),$$

440 we have

$$\frac{\partial \log P^*(\mathbf{y} | \mathbf{x})}{\partial W_q} = \sum_{i=1}^n \frac{\partial \log P^*(y_i | \text{MB}(y_i), \mathbf{x})}{\partial W_q}. \quad (9)$$

441 The partial derivative in the left side of Eq. (9) is a summation of  $n$  terms, each term represents the  
 442 partial derivatives of the pseudo-log-likelihood for each  $y_i$ , conditioned on its Markov blankets. Each  
 443 term can be further simplified as follows:

$$\begin{aligned} & \frac{\partial \log P^*(y_i | \text{MB}(y_i), \mathbf{x})}{\partial W_q} \\ &= \frac{\partial \{-f_{\mathbf{w}}^i(y_i \cup \mathbf{y}_{\setminus i}, \mathbf{x}) - \log Z_i(\mathbf{W}, y_i \cup \mathbf{y}_{\setminus i}, \mathbf{x})\}}{\partial W_q} \\ &= \frac{\partial \{-f_{\mathbf{w}}^i(y_i \cup \mathbf{y}_{\setminus i}, \mathbf{x}) - \log \int_{y_i} \exp[-f_{\mathbf{w}}^i(y_i \cup \mathbf{y}_{\setminus i}, \mathbf{x})]\}}{\partial W_q}. \end{aligned}$$

444 Here, we can easily get

$$\frac{\partial f_{\mathbf{w}}^i(y_i \cup \mathbf{y}_{\setminus i}, \mathbf{x})}{\partial W_q} = \sum_j \mathbf{1}_{\{y_i \rightarrow G_q^{(j)}\}} d(G_q^{(j)}). \quad (10)$$

445 To make the writing concise, we replace the right term of Eq. (10) with the following notation:

$$\Psi_{q, MB(i)} = \sum_j \mathbf{1}_{\{y_i \rightarrow G_q^{(j)}\}} d(G_q^{(j)}).$$

446 In this way, we can deduce that:

$$\begin{aligned} & \frac{\partial \log P^*(y_i \mid \text{MB}(y_i), \mathbf{x})}{\partial W_q} \\ &= -\Psi_{q, MB(i)} - \frac{1}{Z_i(\mathbf{W}, y_i \cup \mathbf{y}_{\setminus i}, \mathbf{x})} \frac{\partial \int_{y_i} \exp[-f_{\mathbf{w}}^i(y_i \cup \mathbf{y}_{\setminus i}, \mathbf{x})]}{\partial W_q}. \end{aligned} \quad (11)$$

447 The partial derivative and the integration in Eq. (11) can be swapped using Lebesgue's dominated  
448 convergence theorem, the Eq. (11) thus becomes:

$$\begin{aligned} & \frac{\partial \log P^*(y_i \mid \text{MB}(y_i), \mathbf{x})}{\partial W_q} \\ &= -\Psi_{q, MB(i)} - \frac{1}{Z_i(\mathbf{W}, y_i \cup \mathbf{y}_{\setminus i}, \mathbf{x})} \int_{y_i} \frac{\partial \exp[-f_{\mathbf{w}}^i(y_i \cup \mathbf{y}_{\setminus i}, \mathbf{x})]}{\partial W_q} \\ &= -\Psi_{q, MB(i)} + \int_{y_i} \frac{\exp[-f_{\mathbf{w}}^i(y_i \cup \mathbf{y}_{\setminus i}, \mathbf{x})]}{Z_i(\mathbf{W}, y_i \cup \mathbf{y}_{\setminus i}, \mathbf{x})} \Psi_{q, MB(i)} \\ &= -\Psi_{q, MB(i)} + \int_{y_i} P^*(y_i \mid \text{MB}(y_i), \mathbf{x}) \Psi_{q, MB(i)} \\ &= -\Psi_{q, MB(i)} + \mathbb{E}_{y_i \mid \text{MB}} [\Psi_{q, MB(i)}]. \end{aligned}$$

449 Therefore, the partial derivative of pseudo-log-likelihood with respect to rule weight  $W_q$  is computed  
450 by:

$$\frac{\partial \log P^*(\mathbf{y} \mid \mathbf{x})}{\partial W_q} = \sum_{i=1}^n \left\{ \mathbb{E}_{y_i \mid \text{MB}} \left[ \sum_j \mathbf{1}_{\{y_i \rightarrow G_q^{(j)}\}} d(G_q^{(j)}) \right] - \sum_j \mathbf{1}_{\{y_i \rightarrow G_q^{(j)}\}} d(G_q^{(j)}) \right\}.$$

### 451 A.3 Calculation of number of ground formulas for Kinship datasets

452 We present a detailed calculation of the number of ground formulas considered by PSL in Kinship  
453 datasets as follows.

454 Given

- 455 • a first-order logical rule  $F_q$  containing  $|\mathcal{I}_q^-|$  premise atoms, and
- 456 • a knowledge base containing  $|\mathcal{E}|$  number of entities,

457 the number of variables in  $F_q$  is  $|\mathcal{I}_q^-| + 1$ .

458 PSL grounds each rule by substituting the variables with all possible entities. The number of ground  
459 formulas created by this logic rule  $F_q$  on the knowledge base is:

$$|\mathcal{E}|^{|\mathcal{I}_q^-|+1}.$$

460 Thus the overall ground formulas created by the rule set  $\{F_q\}_{q=1}^m$  is:

$$\sum_{q=1}^m |\mathcal{E}|^{|\mathcal{I}_q^-|+1}.$$

461 Given the statistics of Kinship datasets in Table 6, rules statistics are shared across different sizes of  
462 Kinship datasets, each dataset contains 12 rules that contain two variables and 9 rules that contain 3  
463 variables. The number of ground formulas considered by PSL is thus computed by:

$$12 \times |\mathcal{E}|^2 + 9 \times |\mathcal{E}|^3. \quad (12)$$

By applying the Eq. (12), we can get the ground formula number for each size of the Kinship dataset, as presented in Table 4:

Table 4: Number of ground formulas of Kinship datasets created by classical grounding method.

| Kinship Size              | S1        | S2         | S3         | S4         | S5          |
|---------------------------|-----------|------------|------------|------------|-------------|
| Number of ground formulas | 1,373,601 | 10,853,976 | 35,798,376 | 74,671,320 | 172,162,935 |

## B Experimental details

### B.1 Dataset statistics

We list the statistics of the real-world knowledge graph datasets in Table 5 and the synthetic Kinship dataset in Table 6. We present detailed descriptions for each dataset below.

*CodeX*. The CodeX dataset, recently proposed for knowledge graph completion tasks, is a comprehensive collection extracted from both Wikidata and Wikipedia. This challenging dataset comes in three versions: small (S), medium (M), and large (L), allowing for comprehensive evaluation.

*YAGO3-10*. YAGO3-10 is a subset of YAGO3 (Suchanek et al., 2007), a large knowledge base completion dataset, with the majority of triples describing attributes of persons, including their citizenship, gender, and profession.

*WN18*. WordNet 18 (WN18) dataset is one of the most commonly used subsets of WordNet.

*WN18RR*. WN18RR is a modified version of WN18 designed to be more challenging for knowledge graph reasoning algorithms by removing reverse relations in the knowledge graph.

*Kinship*. A synthetic dataset, widely used (Zhang et al., 2020; Fang et al., 2023) for evaluating the statistical relational learning ability and the scalability of reasoning algorithms. We use five different sizes of the dataset for evaluating its run time efficiency and parameter scalability, namely Kinship-S1/S2/S3/S4/S5, respectively.

Table 5: Statistics of real-world knowledge base datasets.

| Dataset  | #Ent    | #Rel | #Train/Valid/Test     | #Rules |
|----------|---------|------|-----------------------|--------|
| CodeX-s  | 2,034   | 42   | 32,888/1,827/1,828    | 35     |
| CodeX-m  | 17,050  | 51   | 185,584/10,310/10,311 | 52     |
| CodeX-l  | 77,951  | 69   | 551,193/30,622/30,622 | 57     |
| YAGO3-10 | 123,182 | 37   | 1,079,040/5,000/5,000 | 22     |
| WN18     | 40,943  | 18   | 141,442/ 5,000/ 5,000 | 140    |
| WN18RR   | 40,943  | 11   | 86,835/ 3,034/ 3,134  | 51     |

Table 6: Statistics for Kinship datasets of varied sizes (S1-S5).

|                                            | S1 | S2  | S3  | S4  | S5  |
|--------------------------------------------|----|-----|-----|-----|-----|
| Number of rules containing 1 premise atom  | 12 | 12  | 12  | 12  | 12  |
| Number of rules containing 2 premise atoms | 9  | 9   | 9   | 9   | 9   |
| Number of predicates                       | 15 | 15  | 15  | 15  | 15  |
| Number of entities                         | 52 | 106 | 158 | 202 | 267 |

### B.2 Probabilistic logic reasoning on Kinship Dataset

We assess performance on the Kinship dataset across five different sizes. Due to the full confidence of rules, we only perform inference in this experiment and do not need to update weights. We include

Table 7: Comparative evaluation of reasoning performance on the Kinship dataset.

| Algorithms       | Ground iteration | AUC-ROC          |                  |                  |                  |                  |
|------------------|------------------|------------------|------------------|------------------|------------------|------------------|
|                  |                  | S1               | S2               | S3               | S4               | S5               |
| PSL              | -                | .976±.011        | .980±.005        | .991±.003        | .982±.005        | .972±.004        |
| ExpressGNN       | -                | .957±.002        | .921±.001        | .959±.004        | .940±.001        | .989±.004        |
| DiffLogic-RotatE | 1                | .841±.005        | .895±.001        | .922±.001        | .901±.001        | .903±.000        |
|                  | 2                | .931±.005        | .994±.001        | .998±.001        | .985±.001        | .993±.001        |
|                  | 3                | .937±.005        | .987±.001        | .995±.001        | .978±.001        | .989±.001        |
| DiffLogic-MLP    | 1                | .567±.099        | .537±.041        | .507±.024        | .503±.018        | .504±.014        |
|                  | 2                | .956±.032        | .997±.002        | .999±.003        | .999±.001        | <b>.999±.000</b> |
|                  | 3                | <b>.982±.014</b> | <b>.997±.001</b> | <b>.999±.001</b> | <b>.999±.000</b> | <b>.999±.000</b> |

DiffLogic using two different embedding models, i.e., RotatE and MLP, and evaluate their reasoning performance using RGIG with varied iterations (i.e., 1, 2, 3) for grounding. We include PSL and ExpressGNN as baselines, but we exclude pLogicNet due to its inability to utilize handcrafted rules. Given that the Kinship dataset lacks a validation set, we run each model ten times and report the AUC-ROC statistics from the final epoch of each run on the test set. The results are presented in Table 7, with the best results shown in bold.

### B.3 Comparing inference time on Kinship

We evaluate the inference time on the Kinship dataset across five different sizes. We include models in Appendix B.2 for this experiment. For two DiffLogic variants, we only evaluate their inference time when using 3 iterations of RGIG for grounding. All the runtime experiments are conducted in the same machine with configurations as in Table 8. All of these models are implemented in Python, thereby ensuring a fair comparison. The inference time results are displayed in Table 9, with the best results shown in bold.

Table 8: Machine configuration.

| Component | Specification                               |
|-----------|---------------------------------------------|
| GPU       | NVIDIA GeForce RTX 3090                     |
| CPU       | Intel(R) Xeon(R) Silver 4214R CPU @ 2.40GHz |

Table 9: Comparison of runtime of inference on Kinship.

| Algorithms       | Grounding iteration | Runtime      |              |            |              |                |
|------------------|---------------------|--------------|--------------|------------|--------------|----------------|
|                  |                     | S1           | S2           | S3         | S4           | S5             |
| PSL              | -                   | ~3.6min      | ~7.9min      | ~12.9min   | ~13.5min     | ~32min         |
| ExpressGNN       | -                   | ~18.4min     | ~19.1min     | ~18.9min   | ~19.4min     | ~20.2min       |
| DiffLogic-RotatE | 3                   | 37s          | ~1.5min      | ~3.2min    | ~3.6min      | ~4min          |
| DiffLogic-MLP    | 3                   | <b>21.8s</b> | <b>41.5s</b> | <b>45s</b> | <b>54.4s</b> | <b>~1.2min</b> |
